# Supplementary material
Source: PubMed Central journal article supplement (PMC4895530)
Supplement: JVIM-28-059-s001.pdf [file JVIM-28-059-s001.pdf]

Table 2: Fecal microbiota, determined by 454 pyrosequencing, that were significantly ( $p \leq 0.05$ ) correlated with fecal scores<sup>a</sup> from cats with naturally occurring chronic diarrhea after being fed therapeutic diet Diet X<sup>b</sup> or Diet Y<sup>c</sup> for 4 weeks. Bacteria are sorted according to their phylum.

| Order                  | Family                                 | Genus           | Species     | Correlation Coefficient Diet X | Correlation Coefficient Diet Y |
|------------------------|----------------------------------------|-----------------|-------------|--------------------------------|--------------------------------|
| Phylum: Actinobacteria |                                        |                 |             |                                |                                |
| Coriobacteriales       | Coriobacteriaceae                      | Collinsella     |             | -0.508                         | -0.597                         |
| Coriobacteriales       | Coriobacteriaceae                      | Collinsella     | aerofaciens | -0.361                         |                                |
| Coriobacteriales       | Coriobacteriaceae                      | Slackia         |             | -0.414                         | -0.826                         |
| Phylum: Bacteroidetes  |                                        |                 |             |                                |                                |
| Bacteroidales          | Bacteroidaceae                         | Bacteroides     |             |                                | -0.461                         |
| Bacteroidales          | Bacteroidaceae                         | Bacteroides     | coprocola   |                                | 0.498                          |
| Bacteroidales          | Bacteroidaceae                         | Bacteroides     | coprophilus |                                | -0.486                         |
| Bacteroidales          | Bacteroidaceae                         | Bacteroides     | plebeius    | 0.382                          | -0.464                         |
| Bacteroidales          | Porphyromonadaceae                     | Parabacteroides |             | 0.298                          | 0.219                          |
| Bacteroidales          | Porphyromonadaceae                     | Parabacteroides | distasonis  |                                | 0.259                          |
| Bacteroidales          | Prevotellaceae                         | Prevotella      |             | -0.457                         | 0.471                          |
| Bacteroidales          | Prevotellaceae                         | Prevotella      | copri       | -0.500                         |                                |
| Bacteroidales          | Rikenellaceae                          | Alistipes       |             | -0.270                         |                                |
| Bacteroidales          | Rikenellaceae                          | Alistipes       | putredinis  | 0.291                          |                                |
| Phylum: Firmicutes     |                                        |                 |             |                                |                                |
| Clostridiales          | Catabacteriaceae                       |                 |             |                                | -0.535                         |
| Clostridiales          | Clostridiaceae                         |                 |             | 0.471                          |                                |
| Clostridiales          | Clostridiaceae                         | Clostridium     |             | 0.359                          | 0.204                          |
| Clostridiales          | Clostridiaceae                         | Clostridium     | hiranonis   | -0.293                         | -0.208                         |
| Clostridiales          | Clostridiaceae                         | Clostridium     | perfringens | 0.439                          | -0.296                         |
| Clostridiales          | Clostridiaceae                         | Sarcina         |             | 0.453                          | 0.457                          |
| Clostridiales          | ClostridialesFamily XIII.IncertaeSedis |                 |             | 0.313                          |                                |
| Clostridiales          | ClostridialesFamily                    | Eubacterium     |             | -0.268                         | -0.664                         |

| Order              | Family              | Genus            | Species      | Correlation Coefficient Diet X | Correlation Coefficient Diet Y |
|--------------------|---------------------|------------------|--------------|--------------------------------|--------------------------------|
|                    | XIII.IncertaeSedis  |                  |              |                                |                                |
| Clostridiales      | Lachnospiraceae     |                  |              |                                | -0.764                         |
| Clostridiales      | Lachnospiraceae     | Blautia          |              | -0.416                         | -0.627                         |
| Clostridiales      | Lachnospiraceae     | Coprococcus      |              | -0.470                         | -0.542                         |
| Clostridiales      | Lachnospiraceae     | Roseburia        |              |                                | -0.624                         |
| Clostridiales      | Lachnospiraceae     | Ruminococcus     |              | -0.319                         | -0.371                         |
| Clostridiales      | Lachnospiraceae     | Ruminococcus     | gnavus       | 0.389                          |                                |
| Clostridiales      | Lachnospiraceae     | Ruminococcus     | torques      |                                | 0.452                          |
| Clostridiales      | Ruminococcaceae     |                  |              | -0.432                         | -0.218                         |
| Clostridiales      | Ruminococcaceae     | Clostridium      | orbiscindens |                                | -0.591                         |
| Clostridiales      | Ruminococcaceae     | Faecalibacterium | prausnitzii  |                                | 0.326                          |
| Clostridiales      | Ruminococcaceae     | Oscillospira     |              |                                | 0.383                          |
| Clostridiales      | Veillonellaceae     |                  |              | 0.425                          | 0.263                          |
| Clostridiales      | Veillonellaceae     | Acidaminococcus  | fermentans   |                                | -0.662                         |
| Clostridiales      | Veillonellaceae     | Megamonas        |              | 0.509                          |                                |
| Clostridiales      | Veillonellaceae     | Megasphaera      | elsdenii     | 0.248                          | -0.545                         |
| Erysipelotrichales | Erysipelotrichaceae |                  |              |                                | 0.458                          |
| Erysipelotrichales | Erysipelotrichaceae | Eubacterium      | dolichum     | -0.336                         | -0.493                         |
| Erysipelotrichales | Erysipelotrichaceae | Allobaculum      |              | -0.254                         |                                |
| Erysipelotrichales | Erysipelotrichaceae | Bulleidia        | p_1630_c5    |                                | 0.353                          |
| Erysipelotrichales | Erysipelotrichaceae | Catenibacterium  |              | 0.302                          |                                |
| Erysipelotrichales | Erysipelotrichaceae | Clostridium      | spiroforme   | -0.395                         | 0.513                          |
| Lactobacillales    | Lactobacillaceae    | Lactobacillus    |              | 0.242                          | 0.232                          |
| Lactobacillales    | Lactobacillaceae    | Lactobacillus    | helveticus   | 0.345                          |                                |
| Lactobacillales    | Lactobacillaceae    | Lactobacillus    | saerimneri   | 0.253                          |                                |
| Lactobacillales    | Streptococcaceae    | Streptococcus    |              | 0.211                          | 0.292                          |
| Lactobacillales    | Streptococcaceae    | Streptococcus    | minor        |                                | 0.326                          |

| Order                  | Family              | Genus              | Species            | Correlation Coefficient Diet X | Correlation Coefficient Diet Y |
|------------------------|---------------------|--------------------|--------------------|--------------------------------|--------------------------------|
| Lactobacillales        | Streptococcaceae    | Streptococcus      | suis               | 0.545                          |                                |
| Turicibacterales       | Turicibacteraceae   |                    |                    | 0.283                          |                                |
| Turicibacterales       | Turicibacteraceae   | Turicibacter       |                    | -0.343                         |                                |
| Phylum: Fusobacteria   |                     |                    |                    |                                |                                |
| Fusobacteriales        | Fusobacteriaceae    | J2_29              |                    | -0.219                         |                                |
| Phylum: Proteobacteria |                     |                    |                    |                                |                                |
| Burkholderiales        | Alcaligenaceae      | Sutterella         |                    | -0.401                         | 0.290                          |
| Campylobacteriales     | Campylobacteraceae  | Campylobacter      | upsaliensis        |                                | -0.785                         |
| Campylobacteriales     | Helicobacteraceae   | Flexispira         |                    | 0.453                          | -0.322                         |
| Campylobacteriales     | Helicobacteraceae   | Helicobacter       | cinaedi            | 0.311                          |                                |
| Campylobacteriales     | Helicobacteraceae   | Helicobacter       | muridarum          | 0.373                          |                                |
| Aeromonadales          | Succinivibrionaceae |                    |                    | 0.399                          | -0.710                         |
| Aeromonadales          | Succinivibrionaceae | Anaerobiospirillum | succiniciproducens |                                | 0.204                          |
| Aeromonadales          | Succinivibrionaceae | Succinivibrio      |                    | 0.570                          |                                |
| Enterobacteriales      | Enterobacteriaceae  |                    |                    | 0.300                          |                                |
| Enterobacteriales      | Enterobacteriaceae  | Enterobacter       | hormaechei         | 0.304                          |                                |
| Enterobacteriales      | Enterobacteriaceae  | Escherichia        |                    | 0.256                          | -0.276                         |
| Enterobacteriales      | Enterobacteriaceae  | Raoultella         |                    | 0.379                          | -0.716                         |

<sup>a</sup>Fecal scores were assigned using a 7 point scoring system where 1=extremely dry and firm, 2 to 3 = normal stools, and 7 = very watery: separate scores were assigned for each defecation during the last 7 days on each diet.

<sup>b</sup>Diet X: Hill's<sup>®</sup> Prescription Diet<sup>®</sup> i/d<sup>®</sup> Feline, Hill's Pet Nutrition, Inc., Topeka, KS, USA.

<sup>c</sup>Diet Y: Purina Veterinary Diets<sup>®</sup> EN Gastroenteric<sup>®</sup> brand Feline Formula, Nestlé Purina PetCare Company, St. Louis, MO, USA.
